# Supplementary material for: Inhibitory Effect ofLactobacillus plantarumFL75 andLeuconostoc mesenteroidesFL14againstFoodborne Pathogens in Artificially Contaminated Fermented Tomato Juices
Source: Hindawi journal article supplement (doi:10.1155/2019/6937837), 2019-02-26
Supplement: f1 [file 6937837.f1.pdf]

## **Supplemental materials**

### **Phenotype Microarrays**

The growth on different carbon sources (93) of two *Weissella* strains was assessed using Phenotype Microarray (PM) Technology (Biolog, Hayward, CA). Bacterial cells from a single colony, grown on BHI agar for 48 h were suspended in the specific Biolog medium (adjusted to 65% of transmittance) and used to inoculate the phenotype microarray 96-well plates (PM1 and PM2), according to the manufacturer's instructions. PM plates were incubated for 72 h at 37°C. Data from a single experiment were analyzed with Omnilog-PM software. For each carbon source, the metabolic activity was measured quantitatively based on the area under curve. The two independent replicates of each PM plate showed the same results.

**Supplementary Table S1:** Positive reaction for carbohydrate utilization by two *Weissella halotolerans* strains using Biolog phenotypic microarray.

| Substrats                    | <i>W. halotolerans</i> F99 | <i>W. halotolerans</i> FAS24 |
|------------------------------|----------------------------|------------------------------|
| L-Arabinose                  | +++                        | -                            |
| N-Acetyl-D- Glucosamine      | +++                        | ++                           |
| D-Galactose                  | +++                        | -                            |
| D-Trehalose                  | +++                        | -                            |
| D-Mannose                    | +++                        | +                            |
| Dulcitol                     | -                          | +++                          |
| Glycerol                     | -                          | +++                          |
| D-Gluconic Acid              | +++                        | +++                          |
| D-Xylose                     | ++                         | -                            |
| D-Mannitol                   | +++                        | -                            |
| D-Ribose                     | +++                        | ++                           |
| Tween 20                     | +++                        | -                            |
| D-Fructose                   | +++                        | -                            |
| Alpha-D-Glucose              | +++                        | -                            |
| Maltose                      | +++                        | -                            |
| Thymidine                    | +++                        | -                            |
| Tween 40                     | +++                        | -                            |
| Alpha-D-Lactose              | -                          | -                            |
| Uridine                      | +++                        | ++                           |
| Tween 80                     | +++                        | -                            |
| Maltotriose                  | -                          | ++                           |
| Adenosine                    | ++                         | -                            |
| D-Cellobiose                 | ++                         | -                            |
| Inosine                      | ++                         | +                            |
| N-Acetyl-beta-D- Mannosamine | -                          | ++                           |
| L-Lyxose                     | -                          | +++                          |
| 2-Aminoethanol               | +                          | ++                           |
| Alpha-Cyclodextrin           | +                          | -                            |
| Beta-Cyclodextrin            | +                          | -                            |
| Gama-Cyclodextrin            | +                          | -                            |
| Dextrin                      | +                          | ++                           |
| N-Acetyl-D- Galactosamine    | -                          | -                            |
| D-Arabinose                  | +++                        | +                            |
| Arbutin                      | +                          | +++                          |
| 2-Deoxy-D- Ribose            | +++                        | +++                          |
| Gentiobiose                  | +++                        | -                            |
| L-Glucose                    | -                          | -                            |
| a-Methyl-D- Glucoside        | +++                        | -                            |

(-), absence of activity; (+), weak activity; (++) , moderate activity; (+++), strong activity.
